# Supplementary material for: Sustainable Cellulose-Aluminum-Plastic Composites from Beverage Cartons Scraps and Recycled Polyethylene
Source: MDPI journal article supplement (doi:10.3390/polym14040807), 2022-02-19
Supplement: s1 [file s1]

## Supplementary material

# Sustainable cellulose-aluminum-plastic composites from beverage cartons scraps and recycled polyethylene

Irene Bonadies <sup>1</sup>, Roberta Capuano <sup>1,2</sup>, Roberto Avolio <sup>1,\*</sup>, Rachele Castaldo <sup>1</sup>, Mariacristina Cocca <sup>1</sup>, Gennaro Gentile <sup>1</sup> and Maria Emanuela Errico <sup>1</sup>

<sup>1</sup> National Research Council of Italy, Institute for Polymers Composites and Biomaterials (IPCB-CNR), Via Campi Flegrei 34, 80078 Pozzuoli (NA), Italy; roberto.avolio@cnr.it (R.A.); irene.bonadies@cnr.it (I.B.); roberta.capuano@ipcb.cnr.it (R.Cap.); rachele.castaldo@ipcb.cnr.it (R.Cas.); cocca@ipcb.cnr.it (M.C.); gennaro.gentile@cnr.it (G.G.); mariaem Manuela.errico@cnr.it (M.E.E.)

<sup>2</sup> Department of Mechanical and Industrial Engineering—DIMI, University of Brescia, Via Branze 38, 25121 Brescia, Italy

\* Correspondence: roberto.avolio@cnr.it; (R.A.)

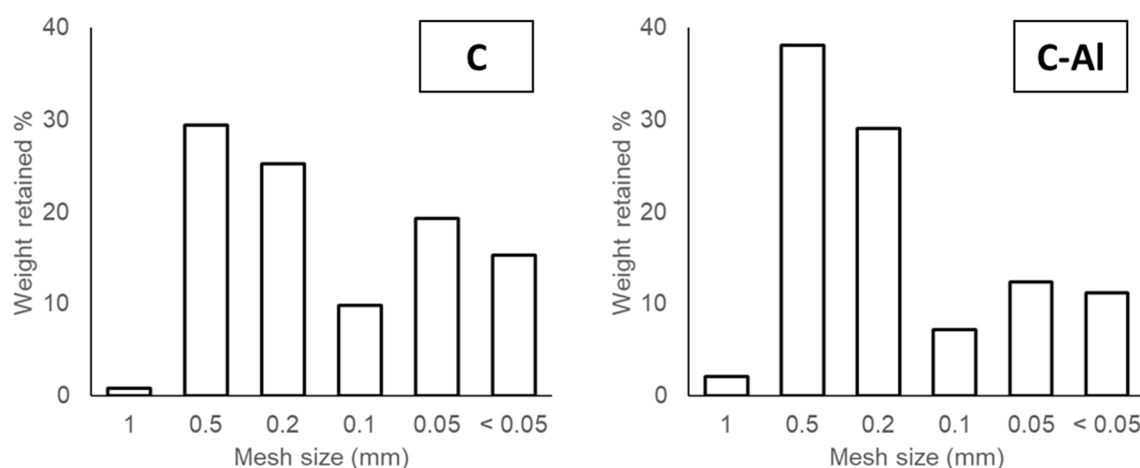

**Figure S1.** Particle size distribution of milled C and C-Al cartons as measured by sieving.

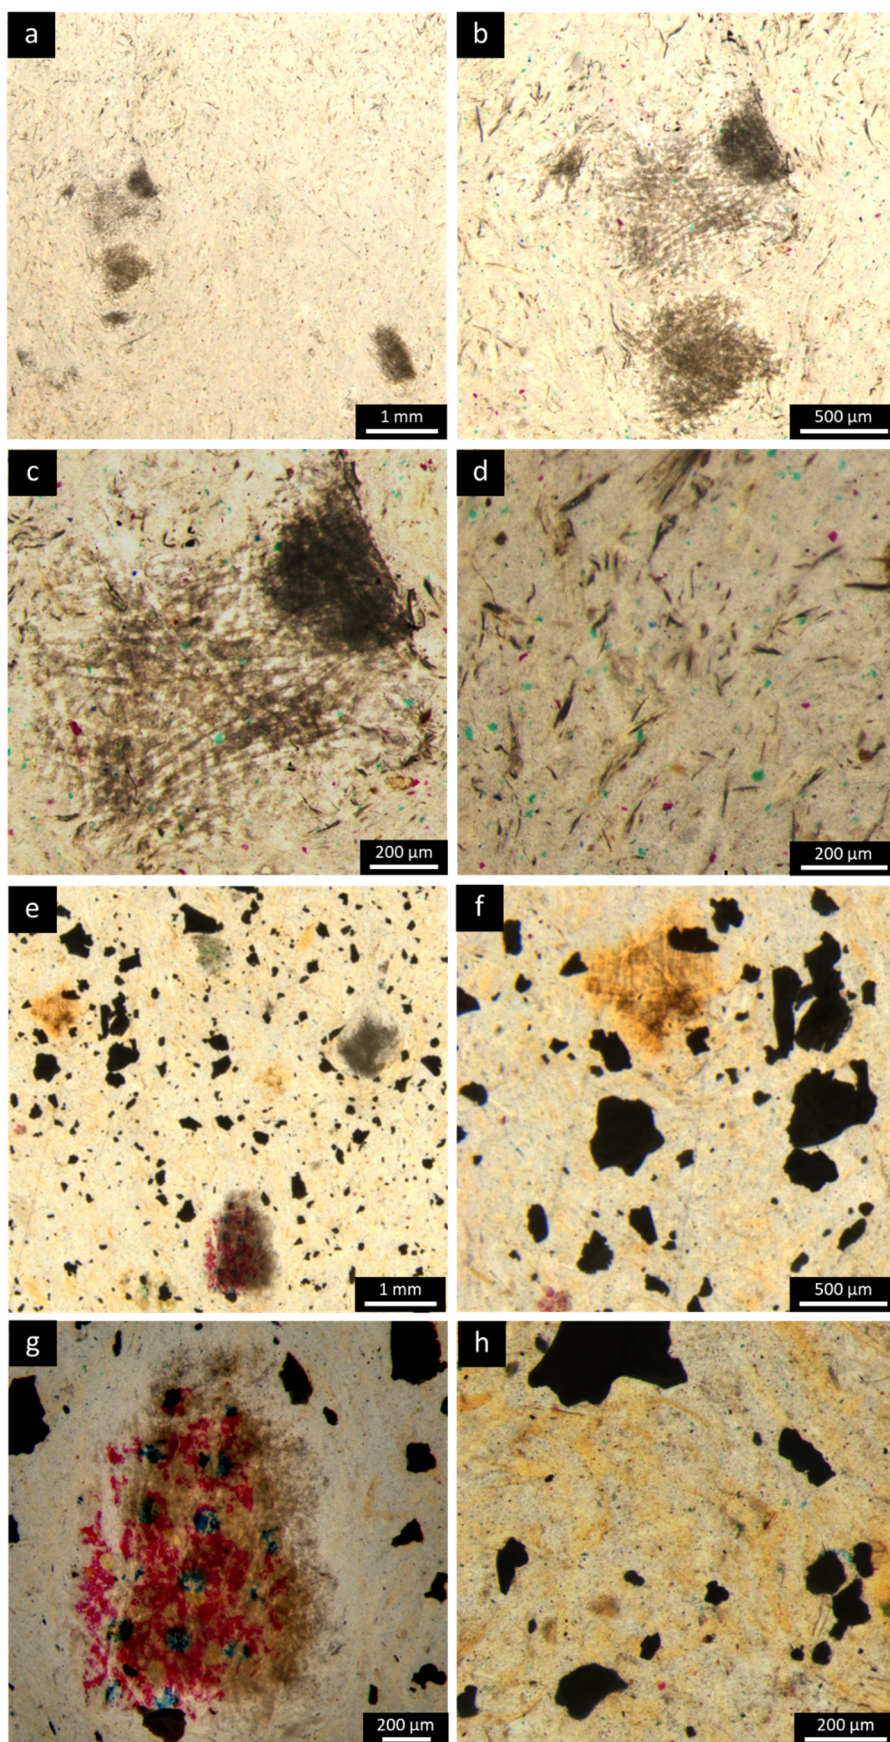

**Figure S2.** Optical micrographs (transmitted light) of films of the M0 C40 (a-d) and M0 CAI40 (e-h) samples, highlighting the presence of single cellulose fibers, along with residual paper-like aggregates. Dark fragments in Figures 4e – 4h are aluminum foil flakes.



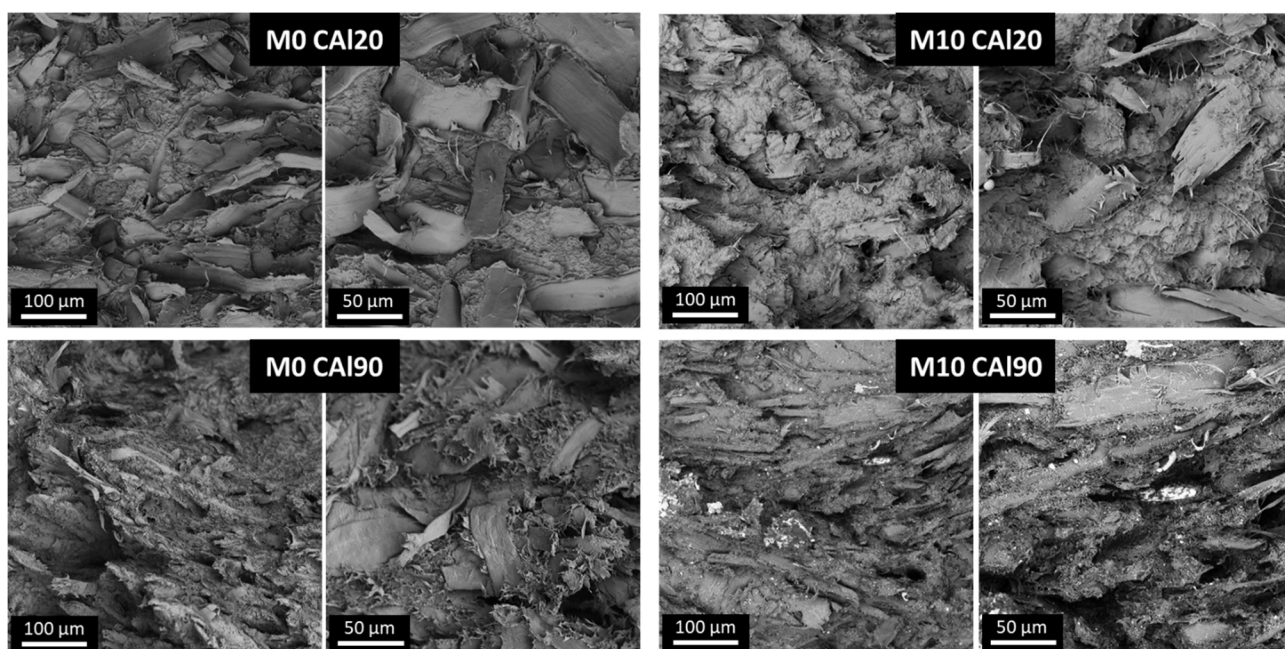

**Figure S3.** SEM micrographs of impact fracture surfaces of samples containing C-Al cartons, without (M0 CAI20, M0 CAI90) and with (M10 CAI20, M10 CAI90) coupling agent, at different magnification levels.

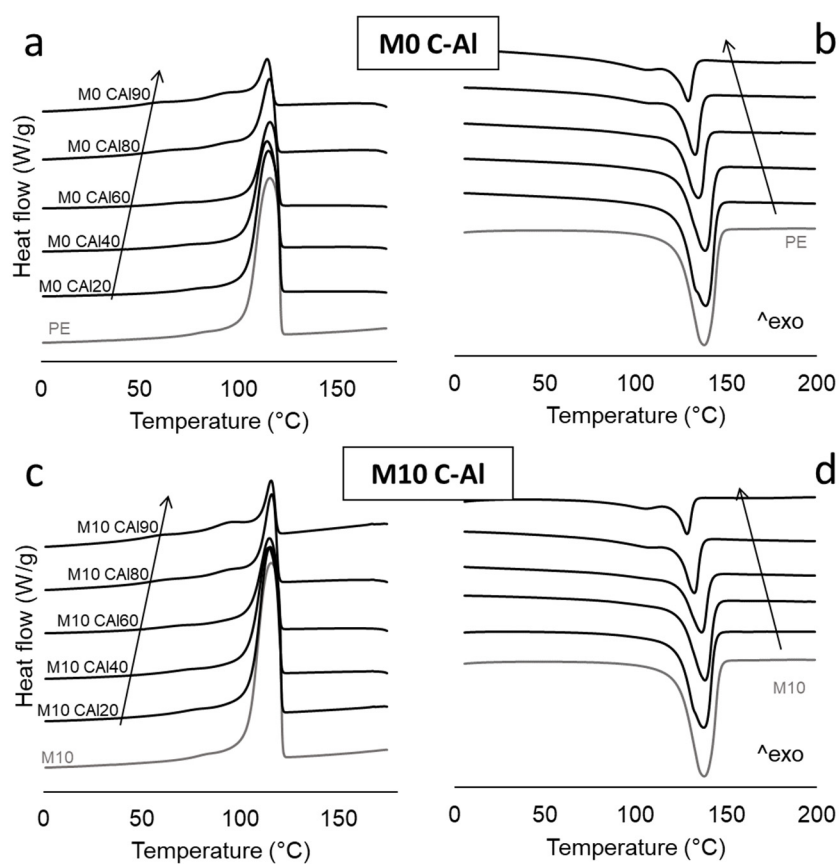

**Figure S4.** DSC thermograms showing the crystallization and melting peaks of M0 C-Al (a, b) and M10 C-Al (c, d) systems, respectively. Arrows indicate increasing MC content.

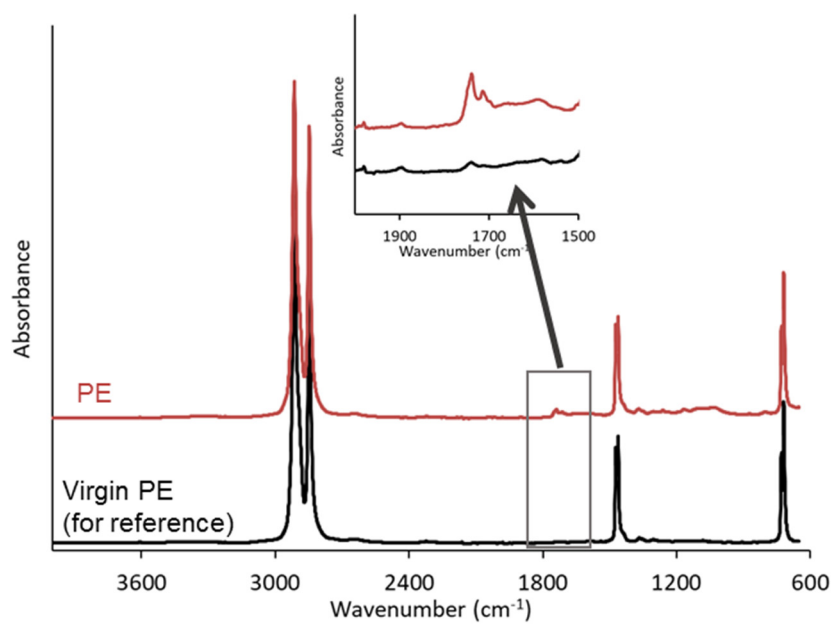

**Figure S5.** ATR-FTIR spectra of the recycled polyethylene used in this work (PE) compared to a virgin HDPE taken as a reference. In the insert, the carbonyl region is highlighted.

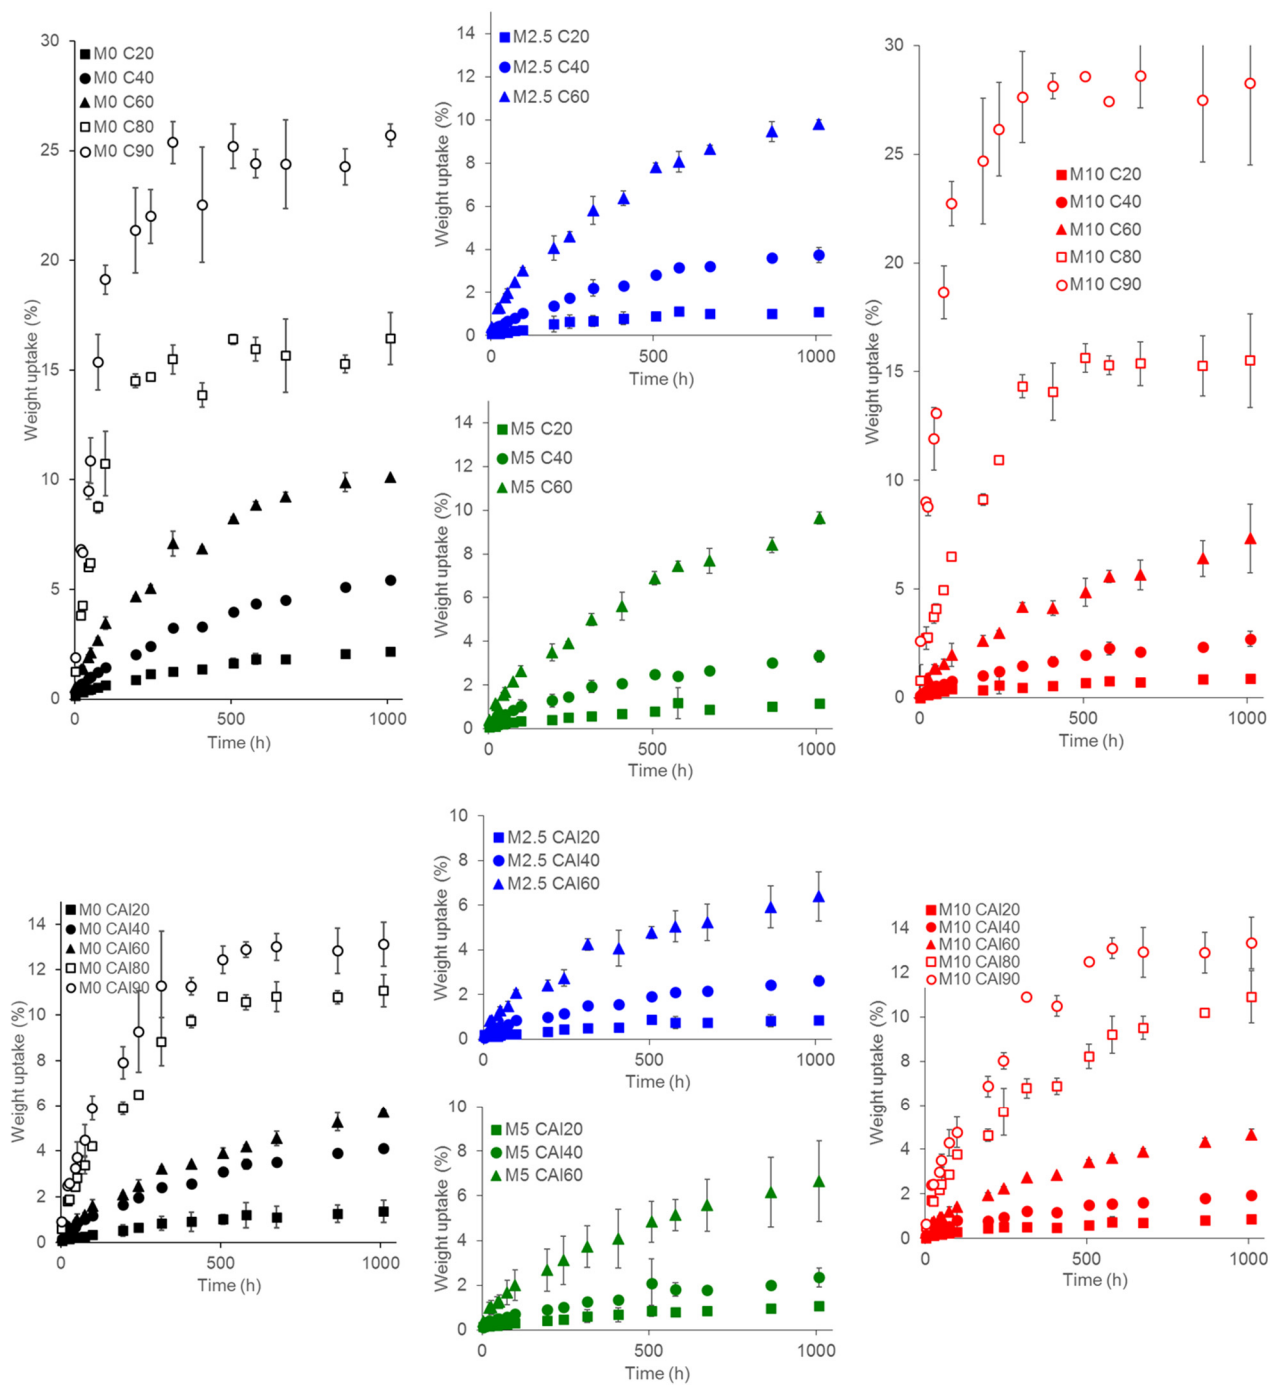

**Figure S6.** Water absorption as a function of water immersion time for the prepared composites.

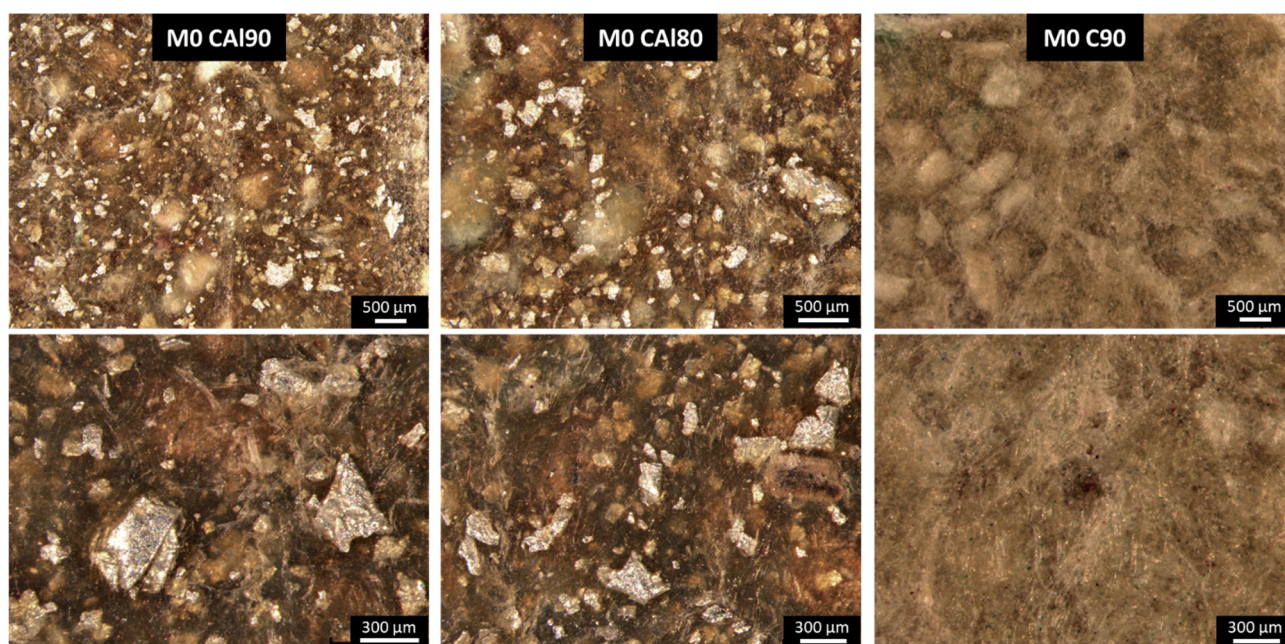

**Figure S7.** Optical micrographs of the surface of high MC content materials, showing the presence of aluminum foil fragments at the surface in the M0 CAI80, and M0 CAI90 samples.

#### **Techniques.**

Details on sieving procedure, SEM, DSC and water absorption analyses are provided in the Materials and Methods section of the paper.

Infrared spectra were collected on a Perkin Elmer Spectrum 100 spectrometer (Perkin Elmer Inc., Waltham, MA, USA) equipped with a diamond Universal ATR cell. The scanned wavenumber range was 4000–650  $\text{cm}^{-1}$ . All spectra were recorded with a resolution of 4  $\text{cm}^{-1}$ , averaging 8 scans.

Optical microscopy analysis was carried out by means of a Leica M205C microscope (Leica Camera AG, Wetzlar, Germania).
